# Supplementary material for: Cell-Type-Specific Translation Profiling Reveals a Novel Strategy for Treating Fragile X Syndrome
Source: PubMed Central journal article supplement (PMC5548955; doi:10.1016/j.neuron.2017.07.013), 2017-08-02
Supplement: mmc1.pdf [file mmc1.pdf]

**Neuron, Volume 95**

**Supplemental Information**

**Cell-Type-Specific Translation Profiling**

**Reveals a Novel Strategy**

**for Treating Fragile X Syndrome**

**Sophie R. Thomson, Sang S. Seo, Stephanie A. Barnes, Susana R. Louros, Melania Muscas, Owen Dando, Caoimhe Kirby, David J.A. Wyllie, Giles E. Hardingham, Peter C. Kind, and Emily K. Osterweil**

## **Inventory of Supplemental Information:**

- 1.) Figure S1 is related to Figure 1D, and shows comparison of genes in CA1-TRAP versus TRAP isolated genes from 2 different cerebellar cell types. GO analysis of differentially expressed genes shows significant enrichment of CA1 cell markers.
- 2.) Figure S2 is related to Figure 2A-D, and shows a comparison between the cumulative distribution of FMRP targets in the differentially expressed population (CA1-TRAP and Input) versus 5 randomly generated sets of genes of the same size.
- 3.) Figure S3 is related to Figure 3A, and shows that although the increase in *Chrm5* in the *Fmr1*<sup>-/-</sup> TRAP is valid, the expression of *Chrm5* in the hippocampus is close to background levels.
- 4.) Figure S4 is related to Figure 4A, and shows the enrichment of *Arc* in CA1-TRAP IPs isolated from DHPG-stimulated hippocampal slices.
- 5.) Figure S5 shows the unprocessed M<sub>4</sub> immunoblots and memcode staining for Figures 4D and 4G.
- 6.) Figure S6 is related to Figure 5, and shows a reduction in protein synthesis rates in both WT and *Fmr1*<sup>-/-</sup> hippocampal slices after M<sub>1</sub> antagonism by pirenzepine.
- 7.) Figure S7 is related to Figure 5C, and shows the effect of VU0152100 on forskolin-stimulated cAMP in *Fmr1*<sup>-/-</sup> hippocampal slices.
- 8.) Table S1 is related to the data shown in Figure 1F and 2F. The table lists genes significantly upregulated in the *Fmr1*<sup>-/-</sup> TRAP.
- 9.) Table S2 is related to the data shown in Figure 1F and 2F. The table lists genes significantly downregulated in the *Fmr1*<sup>-/-</sup> TRAP.
- 10.) Table S3 is related to the data shown in Figure 2E. The table lists protein clans significantly overlapping between *Fmr1*<sup>-/-</sup> TRAP enriched genes and FMRP targets.
- 11.) Tables S4-S6 are related to the data shown in Figure 2F. These tables list GO categories enriched in the genes differentially expressed in the *Fmr1*<sup>-/-</sup> CA1-TRAP.

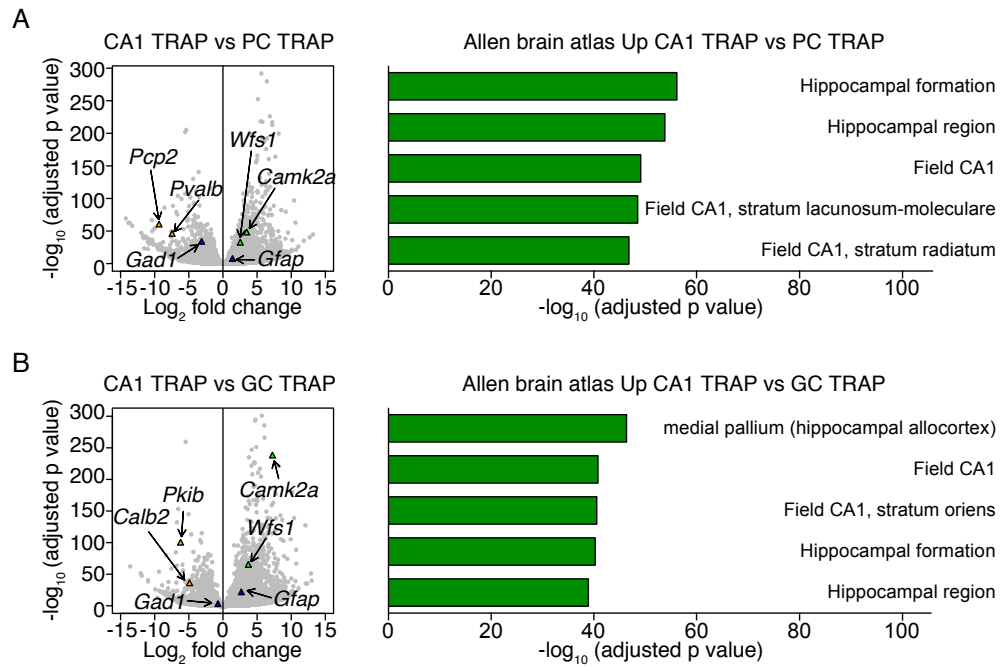

**Figure S1. CA1-TRAP enriches for CA1 marker genes, related to Figure 1D.** Analyses were performed to compare differentially expressed genes in CA1-TRAP versus other published cell types (Mellen et al., 2012). Comparisons between cerebellar Purkinje cells (PC) (**A**) and cerebellar granule cells (GC) (**B**) show differential enrichment of CA1 specific markers. Markers of other cell types shows little or no differential regulation. GO analyses performed on differentially upregulated genes in CA1-TRAP reveal significant enrichment of genes specific to the CA1 hippocampal region (Allen brain atlas up, EnrichR) (Chen et al., 2013).

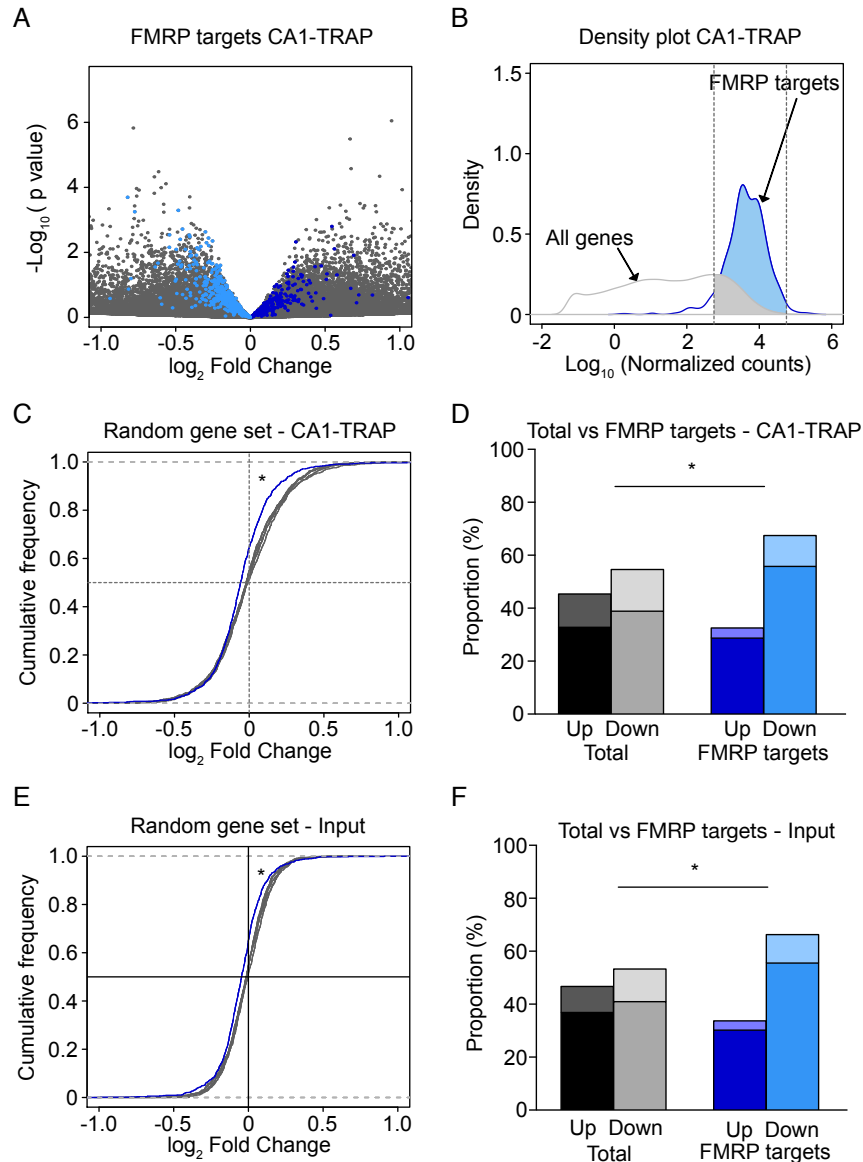

**Figure S2. FMRP targets are reduced in the *Fmr1*<sup>-/-</sup> mRNA population, related to Figure 2A-D.** (A) A DESeq2 plot of differentially expressed genes in *Fmr1*<sup>-/-</sup> CA1-TRAP fractions shows that more FMRP targets (blue) are decreased relative to WT rather than increased. (B) FMRP targets (shaded blue) and genes with a similar level of abundance (shaded gray; DESeq2 normalized counts between  $1 \times 10^{2.75}$  and  $1 \times 10^{4.75}$ ) were selected for downstream analysis. (C) A cumulative distribution of the differential expression ( $\log_2$  fold change) of FMRP target genes shows a significant shift from the differential expression of 5 randomly generated sets of genes of the same size (K-S test  $*p < 1.72 \times 10^{-7}$  (largest p-value, Benjamini and Hochberg adjusted for 5 comparisons)). (D) The proportion of FMRP targets downregulated in the *Fmr1*<sup>-/-</sup> is significantly larger than the total gene population with the same level of abundance (Fisher's exact test  $*p = 1.03 \times 10^{-11}$ ). The majority of these changes are small, with a  $\log_2$  fold change of less than 0.2 (dark shading), however the same pattern is seen in genes changed to a greater degree ( $\log_2$  fold change  $> 0.2$ ; shaded light). (E-F) A comparison of FMRP target versus 5 random gene sets in the Input fraction shows the same difference in cumulative distribution (K-S test  $*p < 4.19 \times 10^{-4}$ , Benjamini and Hochberg adjusted) and proportional downregulation (Fisher's exact test  $*p = 7.28 \times 10^{-11}$ ).

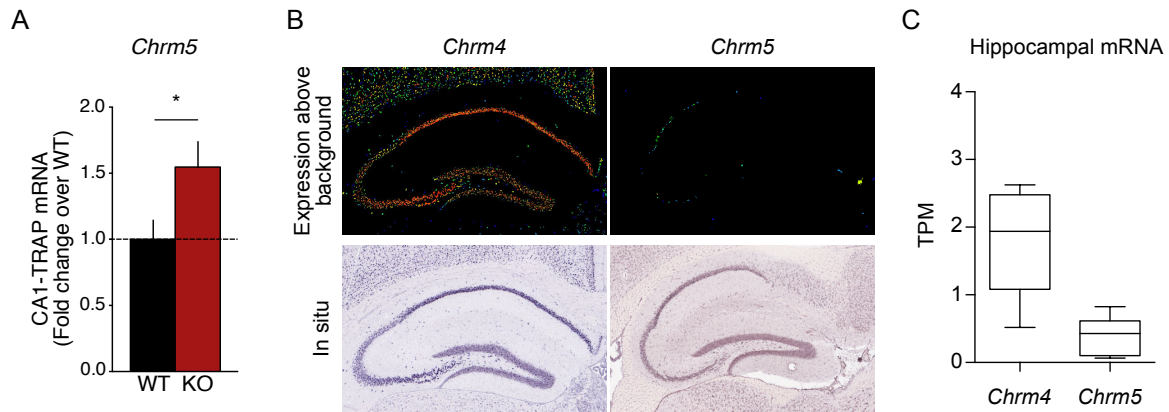

**Figure S3. *Chrm5* is over-translated in *Fmr1*<sup>-/-</sup> but not highly expressed in hippocampus, related to Figure 3A.** (A) Follow up qPCR experiments reveal that *Chrm5* is significantly elevated in the *Fmr1*<sup>-/-</sup> versus WT CA1-TRAP (WT = 1.00 ± 0.145, KO = 1.547 ± 0.1917, \*p = 0.041, n = 17) (B) However, mRNA expression data from the Allen Brain Atlas (<http://brain-map.org/>) reveals that *Chrm4*, but not *Chrm5*, is expressed above background in the hippocampus. (C) Quantification of transcripts per million (TPM) in hippocampal input (from WT) shows a much lower expression level of *Chrm5* versus *Chrm4*.

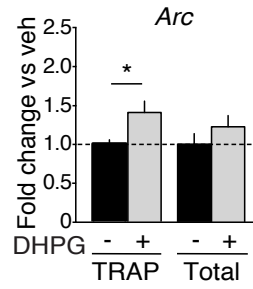

**Figure S4: TRAP reveals increased translation of Arc in DHPG stimulated CA1 neurons, related to Figure 4A.** Hippocampal slices were prepared and stimulated for 5 min with 50  $\mu$ M S-DHPG using an mGluR-LTD induction protocol. After being removed to fresh ACSF for 25 min, slices were homogenized and processed for TRAP. A qPCR analysis of *Arc* mRNA reveals that DHPG increases expression of *Arc* mRNA in CA1-TRAP IP fraction (Veh =  $1.00 \pm 0.07$ , DHPG =  $1.33 \pm 0.06$ , \* $p = 0.016$ ,  $n = 14$ ), with no significant increase in total mRNA (Veh =  $1.00 \pm 0.13$ , DHPG =  $1.22 \pm 0.14$ ,  $p = 0.102$ ,  $n = 11$ ). N = number of animals. Error bars = SEM.

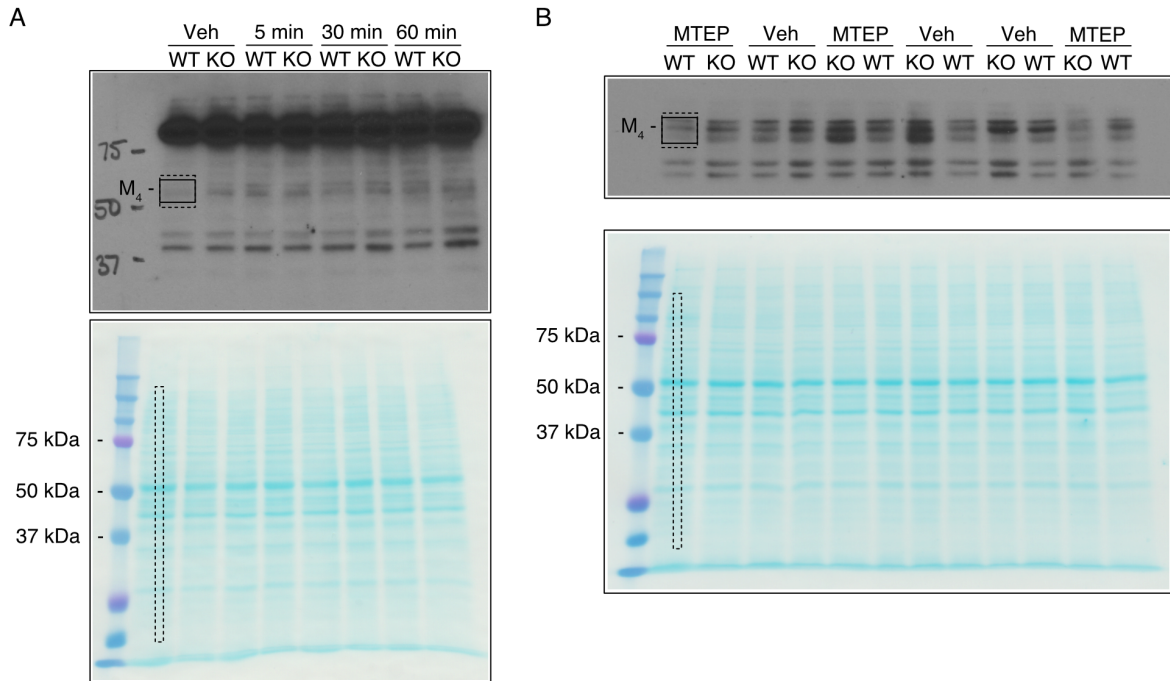

**Figure S5: Unprocessed immunoblots for M<sub>4</sub> and corresponding membranes stained for total protein, related to Figures 4D and 4G.** 10 µg of hippocampal lysate protein from WT and *Fmr1*<sup>-/-</sup> littermates that had been treated with DHPG (A) or MTEP (B) were resolved on the same gel, with the experimenter blind to genotype and treatment. The order in which the samples were loaded onto each gel was randomised. Immunoblotting was performed on either full blots (A) or blot strips cut between 75 KDa and 37 KDa (B; remaining strips from the same membrane were used to probe for antigens at other molecular weights). Densitometry quantification was carried out using Image Studio Lite software (Licor). M<sub>4</sub> bands visible at approximately 56 kDa were quantified and the average background above and below the band was subtracted (solid and dotted boxes on example immunoblot, respectively). Densitometry values were normalized to total protein of that lane. Total protein was visualized using Pierce Memcode Reversible staining kit and quantified using FIJI (dotted box on total protein staining).

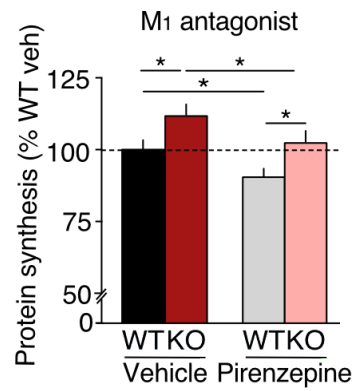

**Figure S6: Antagonism of M<sub>1</sub> by pirenzepine results in a reduction of protein synthesis in both WT and *Fmr1*<sup>-y</sup> hippocampal slices, related to Figure 5.** Treatment with M<sub>1</sub> antagonist pirenzepine (75 nM) significantly reduces protein synthesis in both WT and *Fmr1*<sup>-y</sup> slices (WT veh = 100 ± 3.03%, KO veh = 112.8 ± 3.53%, WT Pz = 89.44 ± 2.71%, KO Pz = 102.5 ± 3.69%, ANOVA genotype \*p = 0.018, treatment \*p = 0.011, WT veh v Pz \*p = 0.021, KO veh v Pz \*p = 0.048, n = 15). N = number of littermate pairs. Error bars = SEM.



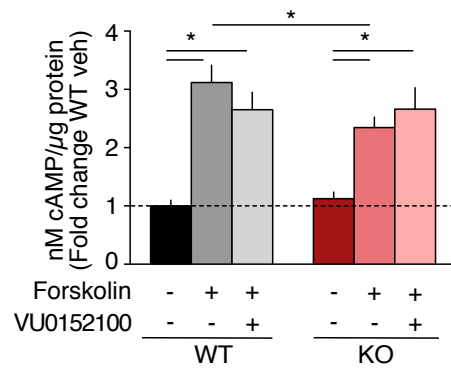

**Figure S7: Effect of VU0152100 on forskolin-stimulated cAMP in *Fmr1<sup>-/-</sup>* hippocampal slices, related to Figure 5C.** Slices were incubated with vehicle or 5  $\mu$ M VU0152100 for then treated with 50  $\mu$ M forskolin or vehicle for 30 minutes. As expected, forskolin stimulation significantly increased cAMP concentration in both genotypes, but to a lesser extent in the *Fmr1<sup>-/-</sup>* (WT veh =  $1.00 \pm 0.09$ , WT FSK =  $3.11 \pm 0.29$ , KO veh =  $1.12 \pm 0.110$ , KO FSK =  $2.34 \pm 0.179$ , ANOVA treatment \* $p < 0.0001$ , genotype x treatment \* $p = 0.0264$ , WT FSK v KO FSK \* $p = 0.0214$ ,  $n = 9$ ). VU0152100 pre-treatment did not result in a significant change in cAMP stimulation in either WT or *Fmr1<sup>-/-</sup>* hippocampal slices (WT VU =  $2.879 \pm 0.295$ , KO VU =  $2.882 \pm 0.357$ , WT FSK v WT VU  $p < 0.306$ , KO FSK v KO VU  $p < 0.4625$ ,  $n = 9$ ). We therefore conclude that VU0152100 does not exert its effect on protein synthesis in *Fmr1<sup>-/-</sup>* through cAMP signalling. N = number of littermate pairs. Error bars = SEM.

**Table S1: Identified genes significantly upregulated in *Fmr1*<sup>-ly</sup> CA1-TRAP, related to the data shown in Figure 1F and 2F.**

| Gene            | Log <sub>2</sub> fold change | p value         | Adjusted p value (FDR) |
|-----------------|------------------------------|-----------------|------------------------|
| <i>Ribc1</i>    | 5.075                        | 3.78E-08        | 0.001                  |
| <i>Fbxw9</i>    | 2.511                        | 1.81E-07        | 0.002                  |
| <i>Efnb2</i>    | 0.945                        | 8.95E-07        | 0.003                  |
| <i>Kifc1</i>    | 6.805                        | 1.92E-06        | 0.004                  |
| <i>Ptgds</i>    | 0.668                        | 3.25E-06        | 0.007                  |
| <i>Ap5b1</i>    | 2.896                        | 1.56E-05        | 0.021                  |
| <i>Cdh23</i>    | 4.427                        | 4.63E-05        | 0.028                  |
| <b>Chrm5</b>    | <b>2.660</b>                 | <b>4.39E-05</b> | <b>0.028</b>           |
| <i>Csf2rb</i>   | 5.186                        | 4.50E-05        | 0.028                  |
| <i>Dffa</i>     | 0.674                        | 2.65E-05        | 0.028                  |
| <i>Dnase1</i>   | 3.744                        | 3.69E-05        | 0.028                  |
| <i>Dvl2</i>     | 1.962                        | 3.42E-05        | 0.028                  |
| <i>Fastk</i>    | 0.865                        | 4.56E-05        | 0.028                  |
| <i>Fndc8</i>    | 5.528                        | 3.82E-05        | 0.028                  |
| <i>Plch1</i>    | 1.282                        | 4.22E-05        | 0.028                  |
| <i>Igf2os</i>   | 8.980                        | 7.90E-05        | 0.038                  |
| <i>L3mbtl4</i>  | 8.302                        | 8.10E-05        | 0.038                  |
| <i>Sh2d4b</i>   | 5.048                        | 9.41E-05        | 0.043                  |
| <i>Stard3nl</i> | 1.016                        | 1.18E-04        | 0.048                  |
| <i>Acer2</i>    | 2.610                        | 1.35E-04        | 0.050                  |
| <i>Dph1</i>     | 3.316                        | 1.41E-04        | 0.051                  |
| <i>Slc35f2</i>  | 3.398                        | 1.49E-04        | 0.051                  |
| <i>Gale</i>     | 2.817                        | 1.65E-04        | 0.054                  |
| <i>Mettl17</i>  | 1.400                        | 2.06E-04        | 0.059                  |
| <i>Ece2</i>     | 1.084                        | 2.64E-04        | 0.069                  |
| <i>Cfap43</i>   | 2.255                        | 3.08E-04        | 0.074                  |
| <i>Psmc3</i>    | 0.734                        | 3.14E-04        | 0.074                  |
| <i>Teddm2</i>   | 1.952                        | 2.97E-04        | 0.074                  |
| <i>Crhbp</i>    | 1.171                        | 3.30E-04        | 0.075                  |
| <i>Cript</i>    | 0.603                        | 3.51E-04        | 0.078                  |
| <i>Hs6st2</i>   | 0.838                        | 3.66E-04        | 0.079                  |
| <i>Rnd2</i>     | 0.765                        | 3.64E-04        | 0.079                  |
| <i>Ankub1</i>   | 3.175                        | 4.40E-04        | 0.085                  |
| <i>Fgf13</i>    | 0.528                        | 4.25E-04        | 0.085                  |
| <i>Gpatch3</i>  | 3.335                        | 4.19E-04        | 0.085                  |
| <i>Mir453</i>   | 4.910                        | 4.53E-04        | 0.085                  |
| <i>Nectin4</i>  | 2.423                        | 4.38E-04        | 0.085                  |
| <i>Ppil2</i>    | 0.756                        | 4.31E-04        | 0.085                  |
| <i>Selenbp2</i> | 7.745                        | 4.12E-04        | 0.085                  |
| <i>Myl4</i>     | 3.560                        | 4.72E-04        | 0.086                  |
| <i>Acot12</i>   | 4.682                        | 4.98E-04        | 0.089                  |
| <i>Nat8f5</i>   | 4.502                        | 5.08E-04        | 0.089                  |
| <i>Anapc13</i>  | 1.354                        | 5.52E-04        | 0.090                  |
| <i>Eif2ak2</i>  | 1.231                        | 5.56E-04        | 0.090                  |
| <i>Kctd13</i>   | 0.639                        | 5.42E-04        | 0.090                  |
| <i>Wdr81</i>    | 0.843                        | 5.65E-04        | 0.090                  |
| <b>Chrm4</b>    | <b>1.825</b>                 | <b>6.41E-04</b> | <b>0.099</b>           |
| <i>Pecr</i>     | 3.550                        | 6.48E-04        | 0.099                  |

**Table S2: Identified genes significantly downregulated in *Fmr1*<sup>-ly</sup> CA1-TRAP, related to the data shown in Figure 1F and 2F.**

| Gene name              | Log <sub>2</sub> fold change | p value         | Adjusted p value (FDR) |
|------------------------|------------------------------|-----------------|------------------------|
| <i>Fmr1</i>            | -1.651                       | 2.69E-07        | 0.002                  |
| <i>Cep68</i>           | -0.783                       | 1.49E-06        | 0.004                  |
| <i>Vit</i>             | -2.968                       | 7.13E-06        | 0.012                  |
| <i>Csad</i>            | -2.042                       | 2.82E-05        | 0.028                  |
| <i>Mphosph9</i>        | -0.642                       | 4.74E-05        | 0.028                  |
| <i>Parg</i>            | -0.614                       | 3.29E-05        | 0.028                  |
| <i>Pknyt1</i>          | -4.171                       | 2.78E-05        | 0.028                  |
| <i>Dusp4</i>           | -1.501                       | 5.34E-05        | 0.030                  |
| <i>Plekhh1</i>         | -0.565                       | 7.73E-05        | 0.038                  |
| <i>Pls3</i>            | -0.597                       | 1.02E-04        | 0.044                  |
| <i>Mag</i>             | -0.762                       | 1.09E-04        | 0.046                  |
| <i>Ikzf4</i>           | -0.745                       | 1.21E-04        | 0.048                  |
| <i>AI607873</i>        | -8.980                       | 1.27E-04        | 0.049                  |
| <i>Clec5a</i>          | -3.200                       | 1.46E-04        | 0.051                  |
| <i>Sox9</i>            | -0.643                       | 1.52E-04        | 0.051                  |
| <i>Sall4</i>           | -5.330                       | 1.65E-04        | 0.054                  |
| <i>AW822252</i>        | -2.854                       | 1.78E-04        | 0.056                  |
| <i>Gprin3</i>          | -0.761                       | 1.86E-04        | 0.057                  |
| <i>Usp33</i>           | -0.406                       | 1.96E-04        | 0.058                  |
| <b><i>Cacna1d</i></b>  | <b>-0.822</b>                | <b>2.02E-04</b> | <b>0.059</b>           |
| <i>Ccdc114</i>         | -4.613                       | 2.76E-04        | 0.069                  |
| <i>Mpeg1</i>           | -1.154                       | 2.54E-04        | 0.069                  |
| <i>Cdca4</i>           | -2.137                       | 3.03E-04        | 0.074                  |
| <i>Rbpms2</i>          | -2.942                       | 3.13E-04        | 0.074                  |
| <i>Trip13</i>          | -3.749                       | 3.34E-04        | 0.075                  |
| <i>Wipfl</i>           | -0.775                       | 3.72E-04        | 0.079                  |
| <i>Ankrd44</i>         | -0.947                       | 4.56E-04        | 0.085                  |
| <i>Cdc73</i>           | -0.407                       | 4.29E-04        | 0.085                  |
| <i>Hells</i>           | -1.906                       | 4.54E-04        | 0.085                  |
| <b><i>Arhgef17</i></b> | <b>-0.482</b>                | <b>5.10E-04</b> | <b>0.089</b>           |
| <i>Glb1</i>            | -1.566                       | 5.24E-04        | 0.089                  |
| <i>Gpr165</i>          | -1.867                       | 5.54E-04        | 0.090                  |
| <b><i>Pcdhgc5</i></b>  | <b>-0.774</b>                | <b>5.62E-04</b> | <b>0.090</b>           |
| <i>Ugt8a</i>           | -0.579                       | 5.79E-04        | 0.092                  |
| <i>Hdh3</i>            | -2.614                       | 6.37E-04        | 0.099                  |

**Table S3: Functional categorization of differentially expressed genes in *Fmr1*<sup>-ly</sup> TRAP versus FMRP targets, related to the data shown in Figure 2E.**

| Overlap     | Protein clan | Description                                                     | DE genes                                         | FMRP target genes                                                                                                                                                                                                                                                                                                                                                                                                                      |
|-------------|--------------|-----------------------------------------------------------------|--------------------------------------------------|----------------------------------------------------------------------------------------------------------------------------------------------------------------------------------------------------------------------------------------------------------------------------------------------------------------------------------------------------------------------------------------------------------------------------------------|
| Overlapping | CL0011       | Immunoglobulin superfamily                                      | <i>Nectin4, Mag</i>                              | <i>Ncan, Bcan, Ptprs, Trio, Unc5a, Speg, Lrrm2, Ptprd, Dscaml1, Ptpnf, Igsf9b, Sirpa, Ncam1, Lrrc4b, Lrrc4, Dscam, Lrr4c, Ntrk2, Ntrk3, Kalrn, Opcml</i>                                                                                                                                                                                                                                                                               |
|             | CL0023       | P-loop containing nucleoside triphosphate hydrolase superfamily | <i>Rnd2, Trip13, Hells, Cdc73, Hs6st2, Kifc1</i> | <i>Myo18a, Pex6, Cacnb3, Kifc2, Chd5, Atp6v1b2, Cnp, Kif1a, Eef1a2, Cacnb4, Chd3, Dync1h1, Nav3, Kif3c, Kif1c, Dlg4, Myh10, Rhobtb2, Myo10, Kif21a, Abca3, Gnal, Smarca2, Atp5b, Kif5c, Dnm1, Abca2, Gnas, Ep400, Tjp1, Atrx, Gnao1, Smarca4, Dhx30, Rab6b, Chst2, Nsf, Myo5a, Eef2, Arhgap5, Opa1, Myo16, Znf1, Dicer1, Kif21b, Ddx24, Dhx9, Setx, Dync2h1, Diras2, Nwd1, Arf3, Dlg2, Chd8, Ndst1, Rhob, Chd6, Kif1b, Chd4, Kif5a</i> |
|             | CL0159       | Ig-like fold superfamily (E-set)                                | <i>Cdh23, Fndc8, Csf2rb, Pcdhgc5</i>             | <i>Ap2a2, Ap1b1, Ptprs, Camta1, Trim9, Ptprg, Pcdhga8, Celsr3, Ptprj, Epha4, Plxna2, Trim2, Ptprd, Pcdh7, Rimb2, Plxna4, Plxna1, Plxnd1, Dscaml1, Pkd1, Mycbp2, Ptpnf, Igsf9b, Ap2b1, Pcdh17, Trim3, Ncam1, Clstn1, Camta2, Fat4, Pcdh10, Sorl1, Dscam, Ptprt, Plxnb1, Fat2, Pcdh9, Ap2a1, Kalrn, Celsr2, Ptprz1, Fat3, Pcdhga10, Pcdhga12, Pcdhga9, Pcdhgc5, Pcdhac2, Pcdhga11, Pcdhgb2, Pcdhgc3, Pcdhgb1, Pcdhgb6,</i>               |

|                 |        |                                                      |                                                                                                                                                                                  |
|-----------------|--------|------------------------------------------------------|----------------------------------------------------------------------------------------------------------------------------------------------------------------------------------|
|                 |        |                                                      | <i>Pcdhga1, Pcdhga2, Pcdhga7, Pcdhga5, Pcdhgb4, Pcdhga4, Pcdhgb5, Pcdhga6, Pcdhgb7, Pcdha4, Pcdhga3</i>                                                                          |
|                 | CL0220 | EF-hand like superfamily                             | <i>Pls3, Plch1, Myl4</i>                                                                                                                                                         |
|                 |        |                                                      | <i>Usp32, Calm1, Camta1, Calm3, Myh10, Tppp, Myo10, Itsn1, Scn8a, Dtna, Plce1, Dst, Rasgrp1, Eps15, Macf1, Plch2, Sparcl1, Ube3b, Myo5a, Plcl2, Camta2, Slc25a23, Nrgn</i>       |
|                 | CL0361 | Classical C2H2 and C2H2 zinc fingers                 | <i>Ikzf4, Sall4</i>                                                                                                                                                              |
|                 |        |                                                      | <i>Peg3, Hivep2, Hivep1, Zfr, Zfp521, Zfp142, Zeb2, Hivep3, Maz, Pde4dip, Egr1, Zbtb38, Zfhx2, Zfp536, Zfp423, Tshz1, Atmin, Sall2, Atxn713, Zfp462, Zfp827</i>                  |
|                 | CL0465 | Ankyrin repeat superfamily                           | <i>Ankrd44, Ankub1</i>                                                                                                                                                           |
|                 |        |                                                      | <i>Git1, Ehmt2, Clip3, Ppp1r13b, Dapk1, Shank3, Mib1, Tnks, Ank1, Fem1b, Ank2, Caskin1, Ankrd12, Ankrd11, Ehmt1, Shank2, Shank1, Myo16, Ankib1, Tanc2, Ankrd17, Anks1b, Ank3</i> |
| Non-overlapping | CL0192 | Family A G protein-coupled receptor like superfamily | <i>Gpr165, Chrm4, Chrm5</i>                                                                                                                                                      |
|                 |        |                                                      | <i>Celsr3, Gabbr1, Gpr162, Gabbr2, Cnr1, Gpr158, Grm5, Grm4, Celsr2</i>                                                                                                          |
|                 | CL0384 | PLC-like phosphodiesterases                          | <i>Plch1</i>                                                                                                                                                                     |
|                 |        |                                                      | <i>Plce1, Plch2, Plcl2</i>                                                                                                                                                       |

**Table S4: Top 5 most significant GO enrichment categories for genes differentially expressed in *Fmr1*<sup>-/-</sup> TRAP, related to the data shown in Figure 2F.**

| Go term                                                    | Overlap | P value     | Z score | Combined score | Genes                            |
|------------------------------------------------------------|---------|-------------|---------|----------------|----------------------------------|
| Acetylcholine receptor activity (GO:0015464)               | 2/18    | 0.002505675 | -3.17   | 5.14           | <i>Chrm4, Chrm5</i>              |
| Microtubule binding (GO:0008017)                           | 4/171   | 0.004110536 | -2.40   | 3.89           | <i>Kifc1, Fmr1, Cript, Fgf13</i> |
| bHLH transcription factor binding (GO:0043425)             | 2/27    | 0.00524048  | -2.42   | 3.91           | <i>Sox9, Ikzf4</i>               |
| Phosphatidylinositol phospholipase C activity (GO:0004435) | 2/28    | 0.005601436 | -2.71   | 4.39           | <i>Chrm5, Plchl</i>              |
| Phospholipase C activity (GO:0004629)                      | 2/30    | 0.006356568 | -2.64   | 4.27           | <i>Chrm5, Plchl</i>              |

**Table S5: Top 5 most significant GO enrichment categories for genes upregulated in *Fmr1*<sup>-/-</sup> TRAP, related to the data shown in Figure 2F.**

| Go term                                                                                | Overlap | P value     | Z score | Combined score | Genes                        |
|----------------------------------------------------------------------------------------|---------|-------------|---------|----------------|------------------------------|
| G-protein coupled acetylcholine receptor signaling pathway (GO:0007213)                | 2/12    | 0.000217241 | -2.78   | 6.81           | <i>Chrm4, Chrm5</i>          |
| regulation of collateral sprouting (GO:0048670)                                        | 2/14    | 0.000298832 | -2.48   | 6.07           | <i>Fgf13, Rnd2</i>           |
| cellular response to drug (GO:0035690)                                                 | 2/49    | 0.003707688 | -2.26   | 3.31           | <i>Acer2, Crhbp</i>          |
| protein polyubiquitination (GO:0000209)                                                | 3/186   | 0.004874445 | -2.25   | 3.29           | <i>Anapc13, Ppil2, Psmc3</i> |
| adenylate cyclase-inhibiting G-protein coupled receptor signaling pathway (GO:0007193) | 2/62    | 0.005872656 | -2.11   | 3.09           | <i>Chrm4, Chrm5</i>          |

**Table S6: Top 5 most significant GO enrichment categories for genes downregulated in *Fmr1*<sup>-/-</sup> TRAP, related to the data shown in Figure 2F.**

| Go term                                                  | Overlap | P value     | Z score | Combined score | Genes                       |
|----------------------------------------------------------|---------|-------------|---------|----------------|-----------------------------|
| stem cell maintenance (GO:0019827)                       | 3/109   | 0.000696115 | -2.18   | 3.64           | <i>Sall4, Sox9, Cdc73</i>   |
| sulfur compound catabolic process (GO:0044273)           | 2/43    | 0.00214969  | -2.32   | 3.87           | <i>Glb1, Csad</i>           |
| centrosome organization (GO:0051297)                     | 2/64    | 0.004699961 | -2.10   | 3.52           | <i>Cep68, Usp33</i>         |
| microtubule organizing center organization (GO:0031023)  | 2/70    | 0.005596655 | -2.13   | 3.56           | <i>Cep68, Usp33</i>         |
| neurotrophin TRK receptor signaling pathway (GO:0048011) | 3/274   | 0.009407354 | -2.42   | 4.05           | <i>Dusp4, Mag, Arhgef17</i> |
